# Supplementary material for: Environmental and economic assessment of global and German production locations for CO2-based methanol and naphtha
Source: Royal Society of Chemistry journal article supplement (doi:10.1039/d1gc01546j), 2021-01-01
Supplement: d1gc01546j1.pdf [file d1gc01546j1.pdf]

1 **Environmental and economic assessment of global and German**  
2 **production locations for CO<sub>2</sub>-based methanol and naphtha**

3 *Simon Kaiser<sup>a1</sup>, Katharina Pronnicki Stefan Bringezu<sup>a</sup>*

4

5

6

**Supplementary Information**

7

8

9 **Content:**

10 **S1: Method and Database for the GIS Analysis**

11 **S2: Calculation Formulars and Economic Parameters**

12 **S3: Location Specific Data**

13 **S4: LCA Results**

14 **S5: Detailed Results of the Contribution Analysis**

15 **S6: Detailed Results of the Economic Assessment**

16 **S7: Uncertainty Analysis**

17 **S8: Data Quality Assessment**

18

---

<sup>a</sup> Center for Environmental Systems Research, University of Kassel, Wilhelmshoeher Allee 47, D-34117 Kassel, Germany

<sup>1</sup> Corresponding author, Email address: [simon.kaiser@uni-kassel.de](mailto:simon.kaiser@uni-kassel.de), Tel.: +49 561 804 6122

## 19 S1: Method and Database for the GIS Analysis

### 20 Step 1: Characterization of the regions

21 The Geoinformation System (GIS) analysis was conducted with the software *ArcGis, Version 10.6*. For  
22 the analysis, the different data layers described in Table 1 were combined in a GIS-model using  
23 Gauß-Krueger coordinates (WGS 1984). The different regions were delineated according to the  
24 watersheds described in Boulay et al. <sup>1</sup>. Since there is no varying of the AWARE factor within one  
25 watershed, a further differentiation was not possible. In case a raster point could not be  
26 unambiguously assigned to one region, it was completely assigned to the region in which the majority  
27 of its area is located. In the next step, the mean value, and the standard deviation for each capacity  
28 factor as well as the number of CO<sub>2</sub>-point sources were calculated for every region using the *zonal*  
29 *statistics* tool. The transport distance from each region to Germany was calculated using the Euclidean  
30 distance between the respective centroids. While the locations of waste incineration and cement  
31 plants could be directly extracted from the respective datasets, the locations of the steel plants were  
32 derived from company reports of the largest global steel producers and cross-checked with domestic  
33 production capacities.

34 *Table 1: Parameters and Data used in the location analysis (IEC = International Electrotechnical Commission).*

| Resource        | Parameter                                          | Description                    | Resolution/<br>Nr. of plants | Data Source |
|-----------------|----------------------------------------------------|--------------------------------|------------------------------|-------------|
| Wind Energy     | Capacity Factor                                    | IEC Class I                    | 9 " x 9 "                    | 2           |
| Solar Energy    | Capacity Factor                                    | kWh/kWp                        | 9 " x 9 "                    | 3           |
| Water           | AWARE (Available Water Remaining)                  | m <sup>3</sup> /m <sup>3</sup> | 0.5 ° x 0.5 °                | 1           |
| CO <sub>2</sub> | Number of industrial CO <sub>2</sub> Point sources | Waste Incineration Plants      | 177                          | 4, 5        |
|                 |                                                    | Cement Plants                  | 1561                         | 6           |
|                 |                                                    | Steel Plants (Blast Furnace)   | 115                          | 7, 8        |

35

### 36 Step 2: Selection of representative examples

37 After the combination of the different data layers and the characterization of the different regions,  
38 best case examples for every system type and distance category were identified according to the  
39 decision procedure described in Figure 1. The selected regions were later used as representative  
40 locations in the environmental and economic assessments.

41

42

43

44

45

46

47

48

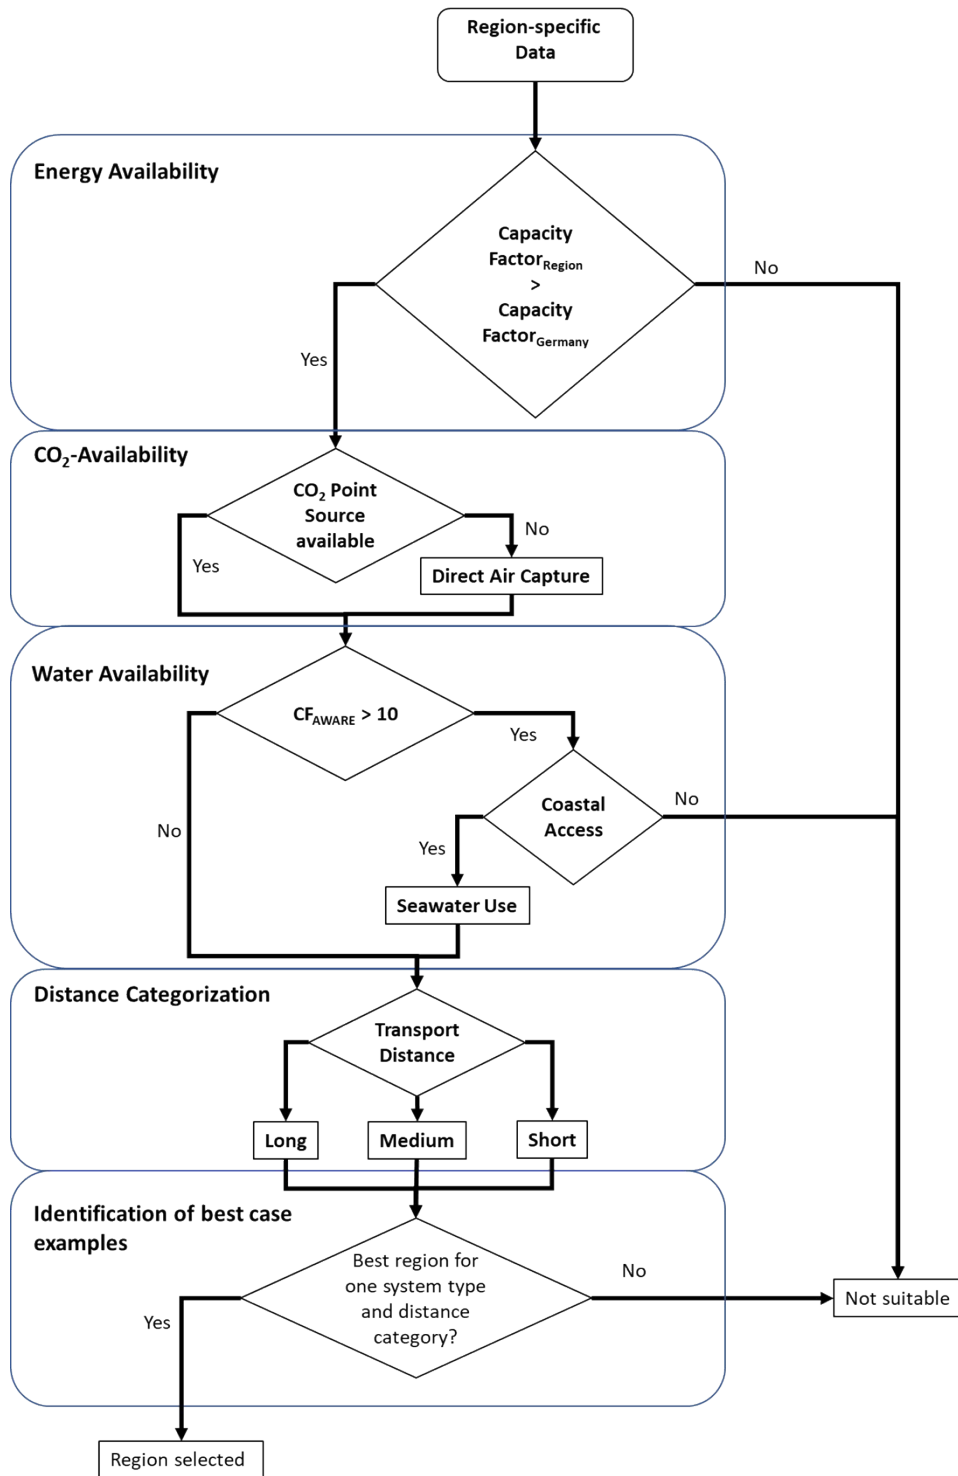

Figure 1: Selection procedure for the identification of best cases for the different system types.

49

50

51 **S2: Calculation Formulars and Economic Parameters**

52 **S2-1: Levelized Cost of Energy (LCOE)**

$$LCOE_{ij} = \frac{\sum_{t=1}^n \frac{Capex_t + Opex_t}{(1 + r_i)^t}}{\sum_{t=1}^n \frac{E_t}{(1 + r_i)^t}} \quad [€/GJ]$$

53

54  $t$ : Period

55  $i$ : Produced Chemical

56  $j$ : Location

57  $Capex_t$ : Capital Expenditures (Investment Costs)

58  $Opex_t$ : Operation Expenditures (Maintenance, Fuel and Personnel Costs)

59  $E_t$ : Cumulated Energy bound in the yearly production volume

60  $r$ : project specific interest rate/weighted average costs of capital

61

62 **S2-2: Avoidance Costs (AC)**

$$AC_{ij} = \frac{LCOE_{ij} - MP_{fossil}}{GWI_{ij} - GWI_{fossil}} \left[ \frac{€}{t \text{ CO}_2 \text{ eq. avoided}} \right]$$

63

64  $i$ : Produced Chemical

65  $j$ : Location

66  $LCOE_{ij}$ : Levelized Costs of Energy

67  $MP_{fossil}$ : Net market price for fossil fuels in the status quo

68

69 **S2-3: Net Present Value (NPV)**

$$NPV_{ij} = - \sum_1^t \frac{Capex_t + Opex_t}{(1 + r_i)^t} + \sum_1^t \frac{(MP_{fossil} * (1 + \Delta PF_t)^t + CP_t * \Delta GWI) * PV_t}{(1 + r_i)^t} \quad [€]$$

70

71

72  $t$ : Period

73  $i$ : Produced Chemical

74  $j$ : Location

$$75 \Delta GWI: \text{Avoided emissions} \left[ \frac{t \text{ CO}_2 \text{ eq. avoided}}{t \text{ Chemical}} \right]$$

76  $PV_t$ : Yearly production volume [t]

77  $CP_t$ : Carbon Price

78  $\Delta PF_t$ : Relative Price change for fossil fuels compared to the status quo

## 79 S2-4: Economic Parameters

80 Table 2: Description of Cost Parameters. (Sq = Status quo, Capex = Capital Expenditures, Opex = operational expenditures, PV  
 81 = Photovoltaic, FLH = Full load hours, PS = Point Source, DAC = Direct Air Capture, RSWO = Reverse Seawater Osmosis, WACC  
 82 = Weighted Average Costs of Capital).

| Process                             | Parameter                                          | Value Sq                 | References | Value 2030              | References |
|-------------------------------------|----------------------------------------------------|--------------------------|------------|-------------------------|------------|
| <b>Onshore wind plant</b>           | Capex [€/MW]                                       | 1,605,000                | 9          | 1,000,000               | 10         |
|                                     | Opex [% Capex]                                     | 2                        |            | 2                       |            |
|                                     | Lifetime [years]                                   | 20                       |            | 20                      |            |
| <b>PV plant</b>                     | Capex [€/MW]                                       | 900,000.00               | 11         | 750,000                 | 11         |
|                                     | Opex [% Capex]                                     | 1                        |            | 1                       |            |
|                                     | Lifetime [years]                                   | 30                       |            | 30                      |            |
| <b>Electrolysis</b>                 | Capex [€/MW]                                       | 1,470,000                | 12         | 500,000                 | 12,13      |
|                                     | Opex [% Capex]                                     | 1                        |            | 1                       |            |
|                                     | Lifetime [FLH]                                     | 60,000                   |            | 90,000                  | 14         |
|                                     | Energy Requirement                                 | 55 kWh/kg H <sub>2</sub> | 12         | 50 kWh/kg               | 12         |
| <b>CO<sub>2</sub> Capture (PS)</b>  | Capex [€] (Scaling Factor: 0.6)                    | 26,680,367               | 15         | 18,676,256              | 16         |
|                                     | Opex [% Capex]                                     | 6                        | 17         | 6                       | 17         |
|                                     | Lifetime [years]                                   | 20                       |            | 20                      |            |
|                                     | Heat Costs [€/kWh]                                 | Country specific         | 18         | Country specific        | 18         |
| <b>CO<sub>2</sub> Capture (DAC)</b> | Capex [€/t CO <sub>2</sub> per year]               | 730.00                   | 19         | 263.50                  | 19         |
|                                     | Opex [% Capex]                                     | 4                        |            | 4                       |            |
|                                     | Heat Costs [€/kWh]                                 | Country specific         | 18         | Country specific        | 18         |
|                                     | Lifetime [FLH]                                     | 105,120                  | 20         | 105,120                 | 20         |
| <b>RSWO</b>                         | Capex [€/m <sup>3</sup> H <sub>2</sub> O per year] | 2.25                     | 21         | 2.25                    | 21         |
|                                     | Opex [% Capex]                                     | 4                        | 22         | 4                       | 22         |
| <b>Freshwater Production</b>        | [€/m <sup>3</sup> ]                                | Region specific          | 23         | Region specific         | 23         |
| <b>Methanol Synthesis</b>           | Capex [€/t MeOH per year]                          | 200.00                   | 24         | 200.00                  | 24         |
|                                     | Opex [% Capex]                                     | 5                        |            | 5                       |            |
|                                     | Lifetime [years]                                   | 20                       |            | 20                      |            |
| <b>FT-Synthesis</b>                 | Capex [€/t Naphtha per year]                       | 300                      | 24         | 300                     | 24         |
|                                     | Opex [% Capex]                                     | 5                        |            | 5                       |            |
|                                     | Lifetime                                           | 20                       |            | 20                      |            |
| <b>Transport Methanol</b>           | [€/km * kg]                                        | 1.96 * 10 <sup>-6</sup>  | 25         | 1.96 * 10 <sup>-6</sup> | 25         |
| <b>Transport FT-</b>                | [€/km * kg]                                        | 9.38 * 10 <sup>-7</sup>  |            | 9.38 * 10 <sup>-7</sup> |            |

---

**Synthesis**

---

**WACC** [%]Country Specific <sup>26</sup>Country Specific <sup>26</sup>

---

### 84 S3: Location Specific Data

85 Due to the condition that the production locations must show a higher capacity factor than in Germany, it was not possible to identify regions with a point  
86 source and wind as energy for the distance categories short and medium. The identified location in Germany is used as a proxy for these distance categories.

87 Table 3: Specific Data for the analyzed locations. The basin number is taken from ref. <sup>1</sup>. (DAC = Direct Air Capture, PS = Point Source, PV = Photovoltaic, Wind = Onshore Wind).

| Country        | Basin Number | Energy Source | Capacity Factor | Aware Factor | CO <sub>2</sub> -Source | Transport Distance [km] | Installed Energy Capacity [MW] |         |       | Installed Electrolyzer Capacity [MW] |         |       |
|----------------|--------------|---------------|-----------------|--------------|-------------------------|-------------------------|--------------------------------|---------|-------|--------------------------------------|---------|-------|
|                |              |               |                 |              |                         |                         | Methanol                       | Naphtha | Delta | Methanol                             | Naphtha | Delta |
| Argentina      | 10,967       | Wind          | 72 %            | 1            | DAC                     | 13,613                  | 221                            | 316     |       | 172                                  | 272     |       |
| Argentina      | 10,851       | Wind          | 64 %            | 17           | PS                      | 13,068                  | 239                            | 343     |       | 194                                  | 306     |       |
| Argentina      | 10,987       | Wind          | 71 %            | 100          | DAC                     | 13,651                  | 223                            | 319     |       | 174                                  | 275     |       |
| Ireland        | 4,569        | Wind          | 63 %            | 8            | DAC                     | 1,433                   | 245                            | 350     |       | 197                                  | 311     |       |
| Germany        | 4,583        | Wind          | 58 %            | 1            | PS                      | 0                       | 253                            | 364     |       | 214                                  | 339     |       |
| Germany        | 4,650        | Wind          | 52 %            | 4            | DAC                     | 0                       | 293                            | 418     |       | 238                                  | 376     |       |
| United Kingdom | 4,073        | Wind          | 62 %            | 11           | DAC                     | 1,310                   | 248                            | 354     |       | 198                                  | 314     |       |
| Venezuela      | 8,199        | Wind          | 69 %            | 6            | DAC                     | 8,312                   | 269                            | 384     |       | 179                                  | 284     |       |
| Western Sahara | 7,564        | Wind          | 75 %            | 94           | DAC                     | 4,091                   | 211                            | 301     |       | 165                                  | 261     |       |
| Turkey         | 6,395        | PV            | 19 %            | 1            | PS                      | 2,248                   | 800                            | 1,151   |       | 666                                  | 1,054   |       |
| Saudi Arabia   | 7,333        | PV            | 21 %            | 9            | PS                      | 4,372                   | 711                            | 1,023   | 30 %  | 592                                  | 937     | 37 %  |
| Bolivia        | 10,043       | PV            | 24 %            | 4            | PS                      | 10,742                  | 624                            | 897     |       | 519                                  | 821     |       |
| Spain          | 6,353        | PV            | 19 %            | 1            | DAC                     | 2,095                   | 799                            | 1,141   |       | 638                                  | 1,010   |       |
| China          | 6,914        | PV            | 24 %            | 8            | DAC                     | 6,425                   | 644                            | 919     |       | 514                                  | 814     |       |
| Argentina      | 10,243       | PV            | 27 %            | 1            | DAC                     | 11,266                  | 564                            | 805     |       | 450                                  | 713     |       |
| Morocco        | 6,530        | PV            | 20 %            | 91           | PS                      | 2,221                   | 728                            | 1,048   |       | 606                                  | 959     |       |
| Saudi Arabia   | 7,119        | PV            | 22 %            | 65           | PS                      | 3,342                   | 671                            | 965     |       | 558                                  | 883     |       |
| Chile          | 10,209       | PV            | 25 %            | 100          | PS                      | 11,333                  | 592                            | 851     |       | 492                                  | 779     |       |
| Egypt          | 6,870        | PV            | 20 %            | 59           | DAC                     | 2,583                   | 757                            | 1,081   |       | 605                                  | 957     |       |
| Namibia        | 10,295       | PV            | 23 %            | 35           | DAC                     | 8,583                   | 670                            | 956     |       | 535                                  | 846     |       |
| Chile          | 10,138       | PV            | 26 %            | 97           | DAC                     | 11,179                  | 607                            | 867     |       | 485                                  | 767     |       |

## 89 S4: LCA Results

90 Table 4: LCA Results for the different impact categories. If water desalination was used as water source, a water incorporation of 0 was assumed. (GWI = Global Warming Impact, RMI = Raw  
91 Material Input, TMR = Total Material Requirement, M = Methanol, N = Naphtha).

| Country              | Basin Number | Energy Source | Capacity Factor | Aware Factor | Carbon Footprint                |        |             |      | Material Footprint |      |                      |      | Water Footprint    |        |                                |        | Land Footprint |  |
|----------------------|--------------|---------------|-----------------|--------------|---------------------------------|--------|-------------|------|--------------------|------|----------------------|------|--------------------|--------|--------------------------------|--------|----------------|--|
|                      |              |               |                 |              | GWI [kg CO <sub>2</sub> eq./MJ] |        | RMI [kg/kg] |      | TMR [kg/kg]        |      | Incorporation [l/MJ] |      | Evaporation [l/MJ] |        | Occupation [m <sup>2</sup> *a] |        |                |  |
|                      |              |               |                 |              | M                               | N      | M           | N    | M                  | N    | M                    | N    | M                  | N      | M                              | N      |                |  |
| Argentina            | 10,851       | Wind          | 64%             | 17           | -0.049                          | -0.056 | 0.04        | 0.05 | 0.05               | 0.07 | 0.00                 | 0.00 | 0.460              | 0.566  | 0.001                          | 0.001  |                |  |
| Argentina            | 10,967       | Wind          | 72%             | 1            | -0.040                          | -0.042 | 0.04        | 0.06 | 0.06               | 0.08 | 0.92                 | 0.98 | 0.644              | 0.714  | 0.001                          | 0.001  |                |  |
| Argentina            | 10,987       | Wind          | 71%             | 100          | -0.040                          | -0.045 | 0.04        | 0.06 | 0.06               | 0.08 | 0.00                 | 0.00 | 0.645              | 0.767  | 0.001                          | 0.001  |                |  |
| Argentina            | 10,243       | PV            | 27%             | 1            | -0.022                          | -0.021 | 0.07        | 0.08 | 0.10               | 0.12 | 5.33                 | 5.69 | 3.232              | 4.266  | 0.012                          | 0.016  |                |  |
| Bolivia              | 10,043       | PV            | 24%             | 4            | -0.034                          | -0.034 | 0.05        | 0.07 | 0.07               | 0.10 | 0.22                 | 0.23 | 3.102              | 4.188  | 0.012                          | 0.017  |                |  |
| Chile                | 10,209       | PV            | 25%             | 100          | -0.035                          | -0.036 | 0.05        | 0.06 | 0.07               | 0.10 | 0.00                 | 0.00 | 6.309              | 8.651  | 0.012                          | 0.016  |                |  |
| Chile                | 10,138       | PV            | 26%             | 97           | -0.020                          | -0.019 | 0.07        | 0.09 | 0.10               | 0.13 | 0.00                 | 0.00 | 3.452              | 4.547  | 0.012                          | 0.017  |                |  |
| China                | 6,914        | PV            | 24%             | 8            | -0.019                          | -0.017 | 0.07        | 0.10 | 0.11               | 0.14 | 0.44                 | 0.47 | 3.641              | 4.823  | 0.013                          | 0.018  |                |  |
| Egypt                | 6,870        | PV            | 20%             | 59           | -0.015                          | -0.010 | 0.08        | 0.11 | 0.12               | 0.16 | 0.00                 | 0.00 | 4.213              | 5.644  | 0.015                          | 0.021  |                |  |
| Germany              | 4,583        | Wind          | 58%             | 1            | -0.050                          | -0.054 | 0.04        | 0.05 | 0.05               | 0.07 | 0.22                 | 0.24 | 0.374              | 0.515  | 0.000                          | 0.001  |                |  |
| Germany              | 4,650        | Wind          | 52%             | 4            | -0.034                          | -0.034 | 0.06        | 0.07 | 0.07               | 0.10 | 0.06                 | 0.06 | 0.613              | 0.779  | 0.001                          | 0.001  |                |  |
| Ireland              | 4,569        | Wind          | 63%             | 8            | -0.035                          | -0.035 | 0.05        | 0.06 | 0.06               | 0.09 | 0.42                 | 0.45 | 0.551              | 0.693  | 0.001                          | 0.001  |                |  |
| Morocco              | 6,530        | PV            | 20%             | 91           | -0.033                          | -0.031 | 0.06        | 0.08 | 0.08               | 0.12 | 0.00                 | 0.00 | 3.554              | 4.880  | 0.014                          | 0.020  |                |  |
| Namibia              | 10,295       | PV            | 23%             | 35           | -0.018                          | -0.015 | 0.08        | 0.10 | 0.11               | 0.14 | 0.00                 | 0.00 | 5.096              | 6.812  | 0.014                          | 0.019  |                |  |
| Saudi Arabia         | 7,119        | PV            | 22%             | 65           | -0.035                          | -0.033 | 0.05        | 0.07 | 0.08               | 0.11 | 0.00                 | 0.00 | 3.265              | 4.493  | 0.013                          | 0.018  |                |  |
| Saudi Arabia         | 7,333        | PV            | 21%             | 9            | -0.033                          | -0.028 | 0.05        | 0.07 | 0.08               | 0.11 | 0.05                 | 0.06 | 3.475              | 4.743  | 0.014                          | 0.019  |                |  |
| Spain                | 6,353        | PV            | 19%             | 1            | -0.006                          | 0.002  | 0.09        | 0.12 | 0.13               | 0.17 | 0.04                 | 0.05 | 4.373              | 5.809  | 0.016                          | 0.022  |                |  |
| Turkey               | 6,395        | PV            | 19%             | 1            | -0.030                          | -0.027 | 0.06        | 0.08 | 0.09               | 0.13 | 0.49                 | 0.52 | 3.891              | 5.341  | 0.016                          | 0.022  |                |  |
| United Kingdom       | 4,073        | Wind          | 62%             | 11           | -0.035                          | -0.035 | 0.05        | 0.07 | 0.07               | 0.09 | 0.00                 | 0.00 | 0.554              | 0.700  | 0.001                          | 0.001  |                |  |
| Venezuela            | 8,199        | Wind          | 69%             | 6            | -0.040                          | -0.042 | 0.05        | 0.06 | 0.06               | 0.08 | 0.33                 | 0.35 | 0.667              | 0.783  | 0.001                          | 0.001  |                |  |
| Western Sahara       | 7,564        | Wind          | 75%             | 94           | -0.043                          | -0.044 | 0.04        | 0.05 | 0.05               | 0.07 | 0.00                 | 0.00 | 0.571              | 0.696  | 0.001                          | 0.001  |                |  |
| Fossil based Process |              | --            |                 |              | 0.034                           | 0.010  | 0.05        | 0.03 | 0.05               | 0.04 | 0.00                 | 0.00 | 0.3697             | 0.3309 | 0.0003                         | 0.0003 |                |  |



93 **S5: Results of the contribution Analysis**

94 For the climate footprint, the heat demand of the CO<sub>2</sub>-capture process (36%) as well as the  
 95 energy (27%) and material supply (23%) of the supply chain are the main drivers. This is  
 96 especially the case for DAC production systems for which the contribution of the capture  
 97 process is on average about 13% higher (41% vs. 28%) than for systems based on point sources.  
 98 The product synthesis (7%) and the transport (6%) only have a minor impact. Hence, there is a  
 99 large potential for further optimization in case for scope 1 as well as for scope 3 emissions. The  
 100 resulting negative climate footprint could be twice as high if the whole supply chain and the  
 101 CO<sub>2</sub>-capture process would be defossilized.

102  
 103 In case of the material footprint, the demand for different metal ores (51 %) is the main driver  
 104 for environmental impacts related to the material requirement. More specifically, for wind-  
 105 based systems, copper and iron are the main drivers, while for PV-based systems copper,  
 106 aluminum as well as silver are the dominating metal flows. Those metals are important for the  
 107 construction processes of the respective energy plants. The fossil fuel supply within the supply  
 108 chain makes up to 26 % of the RMI. In case of minerals (23 %), construction materials like  
 109 cement are the main contributors. Hence, a higher secondary input rate for metals in  
 110 combination with a defossilization of the energy supply would be necessary to significantly  
 111 reduce the RMI of CO<sub>2</sub>-based chemicals and accommodate trade-offs between climate  
 112 footprint reduction and the material footprint.

113  
 114 The main drivers for water evaporation are manufacturing processes (42 %) with the  
 115 production of chemicals and base metals showing the highest contribution. Furthermore, the  
 116 energy supply has the second highest (39 %) impact, which is mostly related to fossil-based  
 117 power plants. The mining processes for fossil fuels (14 %) and metals (5 %) show a minor  
 118 impact. Therefore, an increased efficiency in water use in combination with a defossilization of  
 119 the energy supply are the most important measures to reduce the water footprint for CO<sub>2</sub>-  
 120 based chemicals.

122 **S5-1: Global Warming Impact**

123 *Table 5: Contribution to the climate footprint of CO<sub>2</sub>-based Methanol production.*

| All Locations                    | Relative |       |       | Absolute<br>[kg CO <sub>2</sub> equiv. /MJ] |        |        |
|----------------------------------|----------|-------|-------|---------------------------------------------|--------|--------|
|                                  | Mean     | Min   | Max   | Mean                                        | Min    | Max    |
| <b>Scope 1 (Synthesis)</b>       | 7%       | 4%    | 12%   | 0.05                                        | 0.05   | 0.05   |
| <b>Scope 2 (Capture)</b>         | 36%      | 23%   | 57%   | 0.26                                        | 0.11   | 0.46   |
| <b>Scope 3 (Energy Supply)</b>   | 27%      | 15%   | 42%   | 0.22                                        | 0.06   | 0.41   |
| <b>Scope 3 (Material Supply)</b> | 23%      | 16%   | 37%   | 0.17                                        | 0.07   | 0.29   |
| <b>Scope 3 (Transport)</b>       | 6%       | 3%    | 13%   | 0.05                                        | 0.01   | 0.08   |
| <b>Total emissions</b>           | 100%     | 100%  | 100%  | 0.74                                        | 0.37   | 1.28   |
| <b>Scope 1 (Sequestration)</b>   | -211%    | -385% | -110% | - 1.41                                      | - 1.42 | - 1.41 |
| <b>Net emissions</b>             | -111%    | -285% | -10%  | - 0.67                                      | - 1.05 | - 0.13 |

124

125

126

127

128

129 **S5-2: Raw Material Input**

130 *Table 6: Contribution of different Raw Materials to the Raw Material Input.*

| All Locations       | Relative |     |     | Absolute [kg/kg] |      |      |
|---------------------|----------|-----|-----|------------------|------|------|
|                     | Mean     | Min | Max | Mean             | Min  | Max  |
| <b>Fossil Fuels</b> | 26%      | 18% | 31% | 0.32             | 0.14 | 0.61 |
| <b>Metals</b>       | 51%      | 46% | 58% | 0.61             | 0.40 | 1.06 |
| <b>Minerals</b>     | 23%      | 11% | 32% | 0.26             | 0.11 | 0.34 |

131

132 **S5-3: Water Evaporation**

133 *Table 7: Contribution of different Raw Materials to Water Evaporation*

| All Locations                  | Relative |     |     | Absolute [m <sup>3</sup> /MJ] |       |       |
|--------------------------------|----------|-----|-----|-------------------------------|-------|-------|
|                                | Mean     | Min | Max | Mean                          | Min   | Max   |
| <b>Energy Supply</b>           | 39%      | 29% | 55% | 0.016                         | 0.003 | 0.029 |
| <b>Fossil Fuel Mining</b>      | 14%      | 9%  | 20% | 0.005                         | 0.001 | 0.010 |
| <b>Manufacturing Processes</b> | 42%      | 18% | 60% | 0.026                         | 0.002 | 0.052 |
| <b>Metals Mining</b>           | 5%       | 1%  | 15% | 0.001                         | 0.001 | 0.001 |

134

135 **S6: Detailed Results of the economic assessment**

136 To enhance the validity of the economic assessment, the calculated results for the levelized costs of electricity were compared with existing studies which contain  
137 measured cost data and prognoses for renewable electricity generation <sup>10, 27, 28, 29</sup>. For wind energy, accurate data was available for every region. Therefore, the  
138 endogenously calculated LCOE were modified accordingly. In case a range was available in the literature, the minimum LCOE value was chosen since the input  
139 data for the capacity factor which serves as basis for the plant modelling depicts the technical potential (see SI-8). According to Fraunhofer ISE <sup>29</sup> a LCOE reduction  
140 of 7 % was assumed for wind electricity between 2020 and 2030.

141

142

143

144

145

146

147

148

149

150

151

152

153

154

155

156 **S6-1: Methanol**

157 *Table 8: Calculated levelized production costs of the different process steps and years for CO<sub>2</sub>-based methanol. To calculate the CO<sub>2</sub>-avoidance costs for each location, different yearly changes in*  
 158 *the oil price were assumed (-1%; +2%; +4%). (WACC = Weighted average costs of capital; LCOH<sub>2</sub>/CO<sub>2</sub>/MeOH/Naphtha) = Levelized Costs of H<sub>2</sub>/CO<sub>2</sub>/Methanol/Naphtha production).<sup>26</sup>*

| Location             | WACC <sup>1</sup> | LCOH <sub>2</sub> [€/kg] |            | LCOCO <sub>2</sub> [€/kg] |            | LCONaphtha [€/t] |            | CO <sub>2</sub> -Avoidance Costs [€/t CO <sub>2</sub> ] |            |         |       |       |       |    |
|----------------------|-------------------|--------------------------|------------|---------------------------|------------|------------------|------------|---------------------------------------------------------|------------|---------|-------|-------|-------|----|
|                      |                   | Status quo               | Status quo | 2030                      | Status quo | 2030             | Status quo | 2030                                                    | Status quo |         |       | 2030  |       |    |
|                      |                   |                          |            |                           |            |                  |            |                                                         | -1%        | 2%      | 4%    | -1%   | 2%    | 4% |
| <b>Argentina</b>     | 10.4%             | 6.9 €                    | 3.0 €      | 143 €                     | 68 €       | 1,666 €          | 773 €      | 1,167 €                                                 | 1,102 €    | 1,076 € | 429 € | 270 € | 194 € |    |
| <b>Argentina</b>     | 10.4%             | 4.4 €                    | 2.5 €      | 136 €                     | 64 €       | 1,179 €          | 691 €      | 567 €                                                   | 518 €      | 498 €   | 271 € | 150 € | 93 €  |    |
| <b>Argentina</b>     | 10.4%             | 4.4 €                    | 2.5 €      | 136 €                     | 64 €       | 1,181 €          | 691 €      | 568 €                                                   | 519 €      | 499 €   | 271 € | 150 € | 93 €  |    |
| <b>Argentina</b>     | 10.4%             | 4.6 €                    | 2.5 €      | 42 €                      | 32 €       | 1,072 €          | 653 €      | 440 €                                                   | 397 €      | 380 €   | 218 € | 112 € | 61 €  |    |
| <b>Bolivia</b>       | 7.4%              | 6.4 €                    | 3.1 €      | 37 €                      | 29 €       | 1,414 €          | 747 €      | 794 €                                                   | 734 €      | 709 €   | 340 € | 200 € | 133 € |    |
| <b>Chile</b>         | 4.9%              | 4.9 €                    | 2.3 €      | 114 €                     | 58 €       | 1,208 €          | 624 €      | 806 €                                                   | 725 €      | 691 €   | 315 € | 134 € | 46 €  |    |
| <b>Chile</b>         | 4.9%              | 4.9 €                    | 2.4 €      | 34 €                      | 26 €       | 1,111 €          | 588 €      | 561 €                                                   | 498 €      | 472 €   | 220 € | 79 €  | 11 €  |    |
| <b>China</b>         | 7.4%              | 6.3 €                    | 3.1 €      | 127 €                     | 63 €       | 1,519 €          | 780 €      | 1,091 €                                                 | 1,016 €    | 985 €   | 457 € | 281 € | 197 € |    |
| <b>Egypt</b>         | 7.4%              | 7.4 €                    | 3.6 €      | 130 €                     | 65 €       | 1,742 €          | 889 €      | 1,396 €                                                 | 1,315 €    | 1,281 € | 599 € | 410 € | 318 € |    |
| <b>Germany</b>       | 3.0%              | 4.0 €                    | 2.4 €      | 143 €                     | 93 €       | 1,072 €          | 673 €      | 542 €                                                   | 473 €      | 444 €   | 284 € | 136 € | 63 €  |    |
| <b>Germany</b>       | 3.0%              | 4.0 €                    | 2.4 €      | 52 €                      | 45 €       | 933 €            | 602 €      | 364 €                                                   | 308 €      | 284 €   | 191 € | 71 €  | 11 €  |    |
| <b>Great Britain</b> | 7.3%              | 4.2 €                    | 2.3 €      | 149 €                     | 86 €       | 1,112 €          | 659 €      | 560 €                                                   | 502 €      | 478 €   | 268 € | 133 € | 68 €  |    |
| <b>Ireland</b>       | 8.4%              | 4.3 €                    | 2.4 €      | 155 €                     | 88 €       | 1,148 €          | 676 €      | 584 €                                                   | 528 €      | 505 €   | 279 € | 147 € | 83 €  |    |
| <b>Morocco</b>       | 10.4%             | 5.0 €                    | 3.0 €      | 136 €                     | 64 €       | 1,284 €          | 784 €      | 609 €                                                   | 562 €      | 543 €   | 317 € | 202 € | 147 € |    |
| <b>Morocco</b>       | 7.4%              | 7.4 €                    | 3.6 €      | 37 €                      | 29 €       | 1,615 €          | 838 €      | 937 €                                                   | 877 €      | 852 €   | 405 € | 265 € | 198 € |    |
| <b>Namibia</b>       | 7.4%              | 6.6 €                    | 3.2 €      | 128 €                     | 64 €       | 1,576 €          | 810 €      | 1,177 €                                                 | 1,100 €    | 1,068 € | 499 € | 318 € | 231 € |    |
| <b>Saudi Arabia</b>  | 4.2%              | 5.6 €                    | 2.7 €      | 33 €                      | 26 €       | 1,231 €          | 638 €      | 666 €                                                   | 599 €      | 571 €   | 264 € | 116 € | 44 €  |    |
| <b>Saudi Arabia</b>  | 4.2%              | 5.3 €                    | 2.5 €      | 33 €                      | 26 €       | 1,163 €          | 602 €      | 600 €                                                   | 535 €      | 508 €   | 232 € | 89 €  | 18 €  |    |
| <b>Spain</b>         | 5%                | 6.7 €                    | 3.2 €      | 180 €                     | 123 €      | 1,661 €          | 888 €      | 1,619 €                                                 | 1,512 €    | 1,467 € | 735 € | 495 € | 377 € |    |
| <b>Turkey</b>        | 5.4%              | 7.0 €                    | 3.4 €      | 41 €                      | 34 €       | 1,523 €          | 789 €      | 907 €                                                   | 840 €      | 812 €   | 386 € | 236 € | 162 € |    |
| <b>Venezuela</b>     | 10.4%             | 4.5 €                    | 2.5 €      | 182 €                     | 108 €      | 1,241 €          | 746 €      | 602 €                                                   | 554 €      | 534 €   | 304 € | 185 € | 128 € |    |

159 **S6-2: Naphtha**

160 Table 9: Calculated levelized production costs of the different process steps and years for CO<sub>2</sub>-based naphtha. To calculate the CO<sub>2</sub>-avoidance costs for each location, different yearly changes in the  
 161 oil price were assumed (WACC = Weighted average costs of capital; LCOH<sub>2</sub>/CO<sub>2</sub>/Naphtha) = Levelized Costs of H<sub>2</sub>/CO<sub>2</sub>/Naphtha production).<sup>26</sup>

| Location             | WACC <sup>1</sup> | LCOH <sub>2</sub> [€/kg] |       | LCOCO <sub>2</sub> [€/kg] |       | LCONaphtha [€/t] |         | CO <sub>2</sub> -Avoidance Costs [€/t CO <sub>2</sub> ] |          |          |         |         |         |
|----------------------|-------------------|--------------------------|-------|---------------------------|-------|------------------|---------|---------------------------------------------------------|----------|----------|---------|---------|---------|
|                      | Status quo        | Status quo               | 2030  | Status quo                | 2030  | Status quo       | 2030    | Status quo                                              |          |          | 2030    |         |         |
|                      |                   |                          |       |                           |       |                  |         | -1%                                                     | 2%       | 4%       | -1%     | 2%      | 4%      |
| <b>Argentina</b>     | 10.4%             | 6.8 €                    | 3.4 € | 163 €                     | 84 €  | 4,911 €          | 2,465 € | 3,307 €                                                 | 3,235 €  | 3,207 €  | 1,548 € | 1,372 € | 1,289 € |
| <b>Argentina</b>     | 10.4%             | 4.4 €                    | 2.9 € | 159 €                     | 79 €  | 3,398 €          | 2,198 € | 1,307 €                                                 | 1,265 €  | 1,248 €  | 803 €   | 699 €   | 650 €   |
| <b>Argentina</b>     | 10.4%             | 4.4 €                    | 2.5 € | 159 €                     | 79 €  | 3,400 €          | 1,914 € | 1,241 €                                                 | 1,200 €  | 1,184 €  | 645 €   | 546 €   | 499 €   |
| <b>Argentina</b>     | 10.4%             | 4.6 €                    | 2.5 € | 49 €                      | 38 €  | 3,109 €          | 1,801 € | 938 €                                                   | 905 €    | 891 €    | 501 €   | 418 €   | 379 €   |
| <b>Bolivia</b>       | 7%                | 6.4 €                    | 4.1 € | 44 €                      | 34 €  | 4,207 €          | 2,732 € | 2,311 €                                                 | 2,245 €  | 2,218 €  | 1,442 € | 1,290 € | 1,216 € |
| <b>Chile</b>         | 5%                | 4.9 €                    | 2.3 € | 124 €                     | 66 €  | 3,527 €          | 1,749 € | 2,509 €                                                 | 2,415 €  | 2,375 €  | 1,122 € | 912 €   | 809 €   |
| <b>Chile</b>         | 5%                | 4.9 €                    | 2.4 € | 39 €                      | 30 €  | 3,289 €          | 1,652 € | 1,443 €                                                 | 1,384 €  | 1,359 €  | 649 €   | 519 €   | 455 €   |
| <b>China</b>         | 7.4%              | 6.3 €                    | 4.0 € | 143 €                     | 76 €  | 4,498 €          | 2,844 € | 3,498 €                                                 | 3,406 €  | 3,368 €  | 2,125 € | 1,910 € | 1,807 € |
| <b>Egypt</b>         | 7%                | 7.4 €                    | 3.6 € | 148 €                     | 80 €  | 5,205 €          | 2,591 € | 5,392 €                                                 | 5,271 €  | 5,220 €  | 2,511 € | 2,229 € | 2,093 € |
| <b>Germany</b>       | 3%                | 4.0 €                    | 2.4 € | 153 €                     | 102 € | 3,082 €          | 1,881 € | 1,403 €                                                 | 1,338 €  | 1,310 €  | 799 €   | 658 €   | 588 €   |
| <b>Germany</b>       | 3%                | 4.0 €                    | 2.3 € | 55 €                      | 47 €  | 2,723 €          | 1,687 € | 836 €                                                   | 791 €    | 772 €    | 480 €   | 383 €   | 335 €   |
| <b>Great Britain</b> | 7%                | 4.2 €                    | 2.3 € | 157 €                     | 92 €  | 3,204 €          | 1,837 € | 1,421 €                                                 | 1,366 €  | 1,343 €  | 752 €   | 624 €   | 563 €   |
| <b>Ireland</b>       | 8%                | 4.3 €                    | 2.8 € | 168 €                     | 98 €  | 3,309 €          | 2,150 € | 1,470 €                                                 | 1,417 €  | 1,396 €  | 907 €   | 782 €   | 722 €   |
| <b>Morocco</b>       | 10.4%             | 5.0 €                    | 3.0 € | 163 €                     | 81 €  | 3,757 €          | 2,231 € | 1,414 €                                                 | 1,373 €  | 1,357 €  | 790 €   | 690 €   | 642 €   |
| <b>Morocco</b>       | 7%                | 7.4 €                    | 3.6 € | 45 €                      | 35 €  | 4,869 €          | 2,442 € | 2,515 €                                                 | 2,455 €  | 2,429 €  | 1,176 € | 1,034 € | 966 €   |
| <b>Namibia</b>       | 7%                | 6.6 €                    | 3.2 € | 144 €                     | 77 €  | 4,660 €          | 2,322 € | 3,901 €                                                 | 3,802 €  | 3,761 €  | 1,803 € | 1,573 € | 1,462 € |
| <b>Saudi Arabia</b>  | 4%                | 5.6 €                    | 3.3 € | 39 €                      | 30 €  | 3,696 €          | 2,233 € | 2,004 €                                                 | 1,930 €  | 1,899 €  | 1,143 € | 982 €   | 902 €   |
| <b>Saudi Arabia</b>  | 4%                | 5.3 €                    | 2.5 € | 38 €                      | 30 €  | 3,490 €          | 1,738 € | 1,636 €                                                 | 1,572 €  | 1,545 €  | 734 €   | 594 €   | 525 €   |
| <b>Spain</b>         | 5%                | 6.7 €                    | 4.1 € | 186 €                     | 125 € | 4,873 €          | 3,046 € | 13,200 €                                                | 12,857 € | 12,713 € | 7,943 € | 7,175 € | 6,801 € |
| <b>Turkey</b>        | 5%                | 7.0 €                    | 4.3 € | 47 €                      | 38 €  | 4,588 €          | 2,863 € | 2,580 €                                                 | 2,509 €  | 2,479 €  | 1,546 € | 1,386 € | 1,308 € |
| <b>Venezuela</b>     | 10.4%             | 4.5 €                    | 3.0 € | 196 €                     | 116 € | 3,545 €          | 2,339 € | 1,385 €                                                 | 1,342 €  | 1,325 €  | 873 €   | 768 €   | 718 €   |

163 **S6-3: Cost Composition**

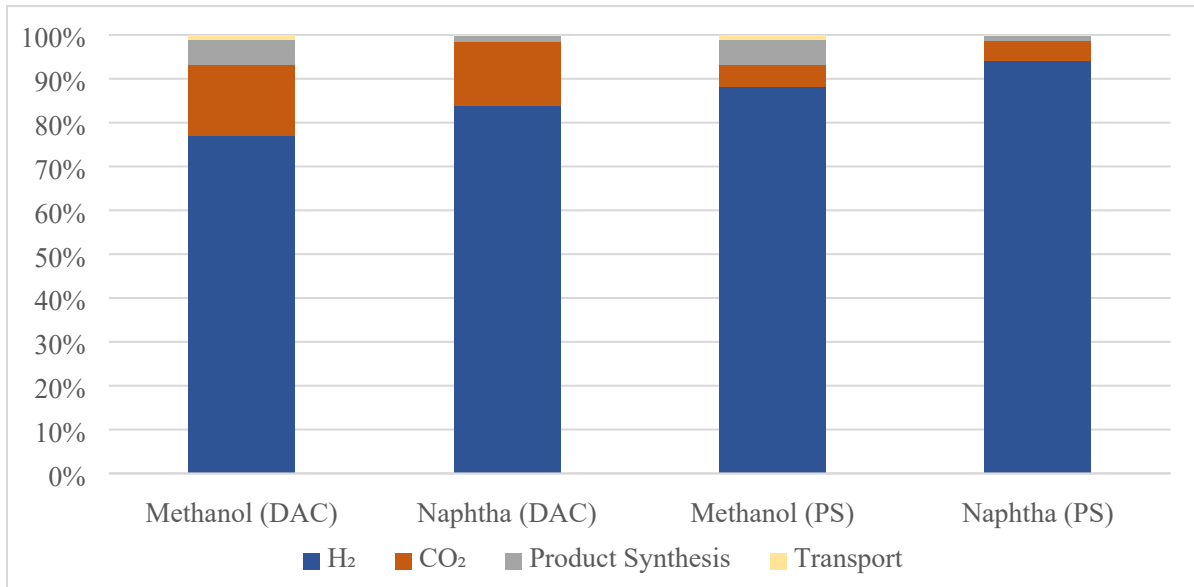

164

165 Figure 2: Average cost composition for the production and import of CO<sub>2</sub>-based methanol and naphtha using Direct Air  
 166 Capture (DAC) or a point source (PS) as CO<sub>2</sub> source.

167

168 **S6-4: Net Present Value**

169 For the NPV calculation the following prices were assumed for the fossil methanol (2020: 322€/t,  
 170 2030: 292 up to 477 €/t) and naphtha production (2020: 414€/t, 2030: 374 €/t up to 616 €/t).

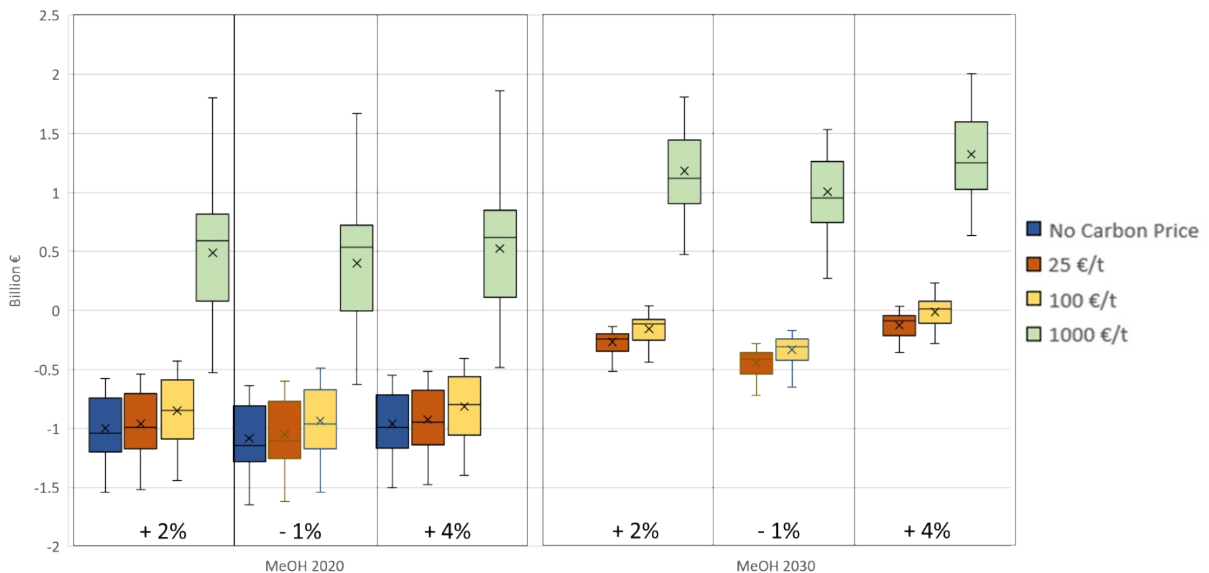

171

172 Figure 3: Results for the Net Present Value for CO<sub>2</sub>-based Methanol production, depending on the oil price development  
 173 (+4%, +2%, -1%) and the carbon price in € per ton CO<sub>2</sub> avoided.

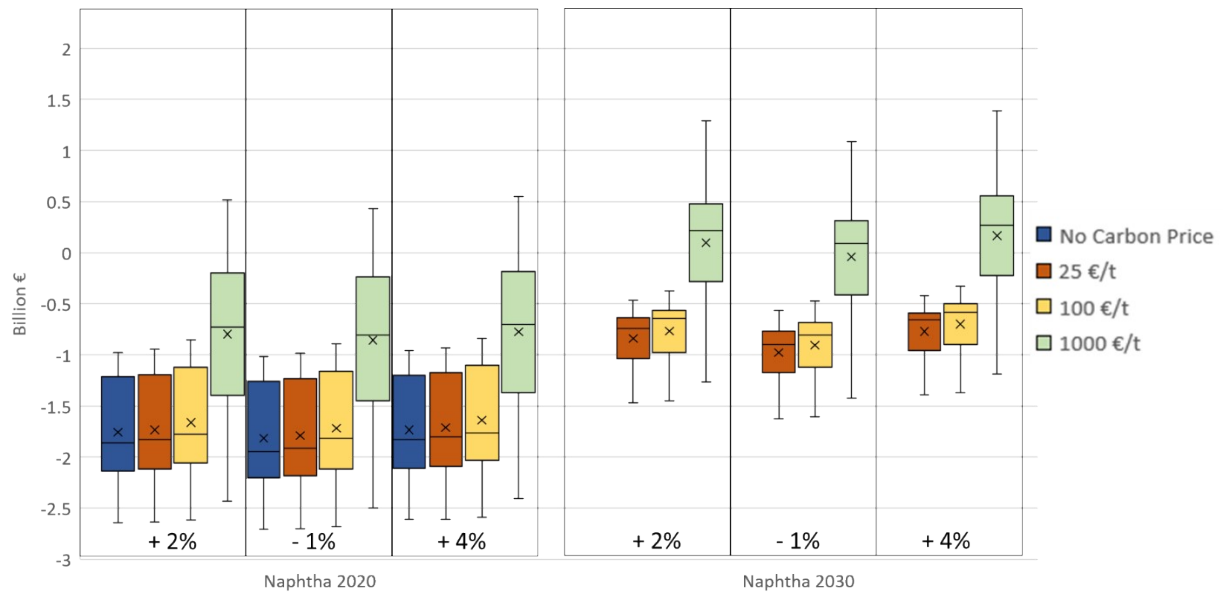

174

175 Figure 4: Results for the Net Present Value for CO<sub>2</sub>-based Naphtha production, depending on the oil price development (+4%,  
 176 +2%, -1%) and the carbon price in € per ton CO<sub>2</sub> avoided.

177

178 **S7: Uncertainty Analysis**

179 **S7-1: Monte Carlo Analysis**

180 *Table 10: Results of the Monte Carlo Analysis for one onshore wind and one photovoltaic location for CO<sub>2</sub>-based Methanol.*  
 181 *(CF = Capacity Factor, GWI = Global Warming Impact, RMI = Raw Material Input, STD = Standard Deviation).*

| Energy Source | Country (CF)     | Indicator | Mean  | Min   | Max   | STD  |
|---------------|------------------|-----------|-------|-------|-------|------|
| Wind          | Argentina (71 %) | GW        | -0.84 | -0.95 | -0.67 | 0.05 |
|               |                  | RMI       | 0.95  | 0.75  | 1.24  | 0.07 |
| Photovoltaic  | Chile (26 %)     | GW        | -0.36 | -0.55 | -0.01 | 0.08 |
|               |                  | RMI       | 1.52  | 1.2   | 2.06  | 0.16 |

182

183 **S7-2: Sensitivity Analysis**

184 In the sensitivity analysis, the influence of a capacity factor alteration on the ecological and economic  
 185 results was calculated for methanol and naphtha production, differentiated between the energy  
 186 sources. To exclude the influence of different CO<sub>2</sub> sources, the sensitivity analysis was conducted only  
 187 for systems using an identical CO<sub>2</sub> source. Because more results are available for systems using Direct  
 188 Air Capture, this system type was selected for the sensitivity analysis. The resulting sensitivities  
 189 correspond to the slope of the trend line calculated by linear regression analysis.

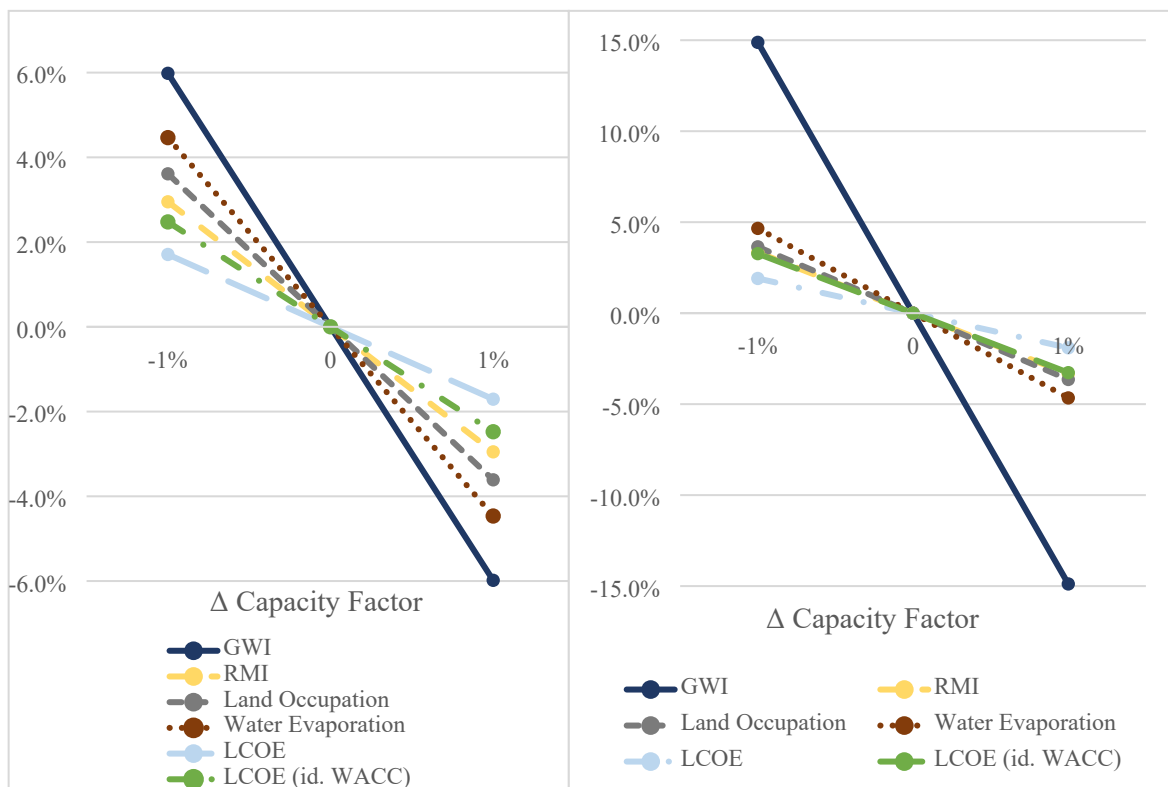

190

191 *Figure 5: Results of the sensitivity analysis for CO<sub>2</sub>-based methanol (left) and naphtha (right) production with photovoltaic*  
 192 *plants as electricity and DAC as CO<sub>2</sub> source (GWI = Global Warming Impact; RMI = Raw Material Input; LCOE = Levelized*  
 193 *Costs of Electricity; id. WACC = identical weighted average costs of capital of 5 % for all locations).*

194



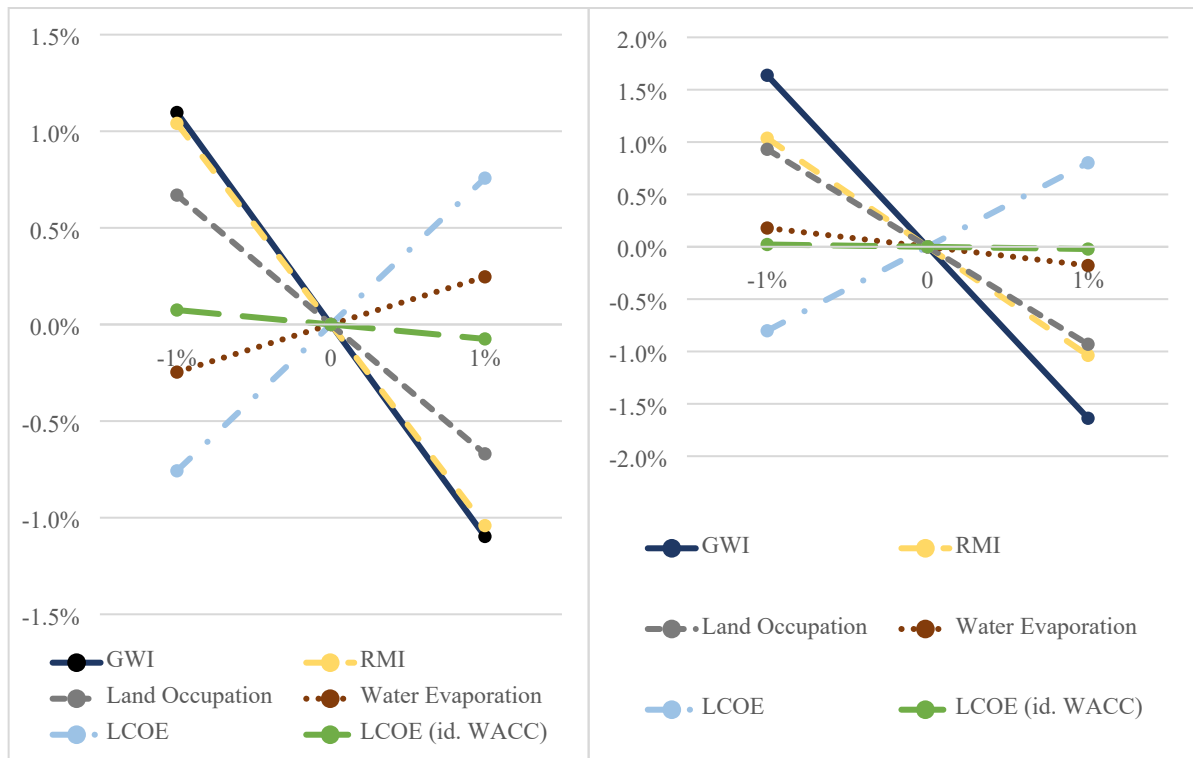

195

196 Figure 6: Results of the sensitivity analysis for CO<sub>2</sub>-based methanol (left) and naphtha (right) production with onshore wind  
 197 plants as electricity and DAC as CO<sub>2</sub> source. (GWI = Global Warming Impact; RMI = Raw Material Input; LCOE = Levelized  
 198 Costs of Electricity; id. WACC = identical weighted average costs of capital of 5 % for all locations).

### 199 S7-3: Manova

200 A one-way Manova was conducted (n = 21) using the software SPSS Statistics, version 26. As  
 201 significance level, an alpha-value of 0.05 was assumed. The results of the multivariate analysis (Table  
 202 11) show the significant effect (p < 0.05) of the variables CO<sub>2</sub> and Energy source on the combined  
 203 dependent variables, while the Water Source and Transport Distance do not show a significant effect.

204 Table 11: Results of the multivariate test for the independent variables

| Independent Variable   | Test procedure | Value | Hypothesis df | Error df | F       | Significance |
|------------------------|----------------|-------|---------------|----------|---------|--------------|
| Water Source           | Wilks-Lambda   | 0.583 | 5             | 9        | 1,288   | 0.348        |
| CO <sub>2</sub> Source | Wilks-Lambda   | 0.075 | 5             | 9        | 22,087  | 0.000        |
| Energy Source          | Wilks-Lambda   | 0.006 | 5             | 9        | 281,474 | 0.000        |
| Transport Distance     | Wilks-Lambda   | 0.004 | 5             | 9        | 126,939 | 0.063        |

205

206 The results of the post-hoc tests (Table 12) show if there are significant effects of the independent  
 207 variables Energy and CO<sub>2</sub> source on single dependent variables. While the values for the energy source  
 208 show a significant effect on all dependent variables, the CO<sub>2</sub> source only shows a significant effect on  
 209 the GWI and RMI.

210

211 *Table 12: Results of the post-hoc tests for those independent variables with a significant effect on the combined variable*  
 212 *(GWI = Global Warming Impact, RMI = Raw Material Input, Evaporation, LCO MeOH = Levelized Costs of Methanol*  
 213 *production)*

| <b>Independet Variable</b>   | <b>Dependent Variable</b> | <b>Typ III Sum of Squares</b> | <b>Mean of squares</b> | <b>F</b> | <b>Significance</b> |
|------------------------------|---------------------------|-------------------------------|------------------------|----------|---------------------|
| <b>CO<sub>2</sub> Source</b> | GWI                       | 0.352                         | 0.352                  | 46.343   | 0.000               |
|                              | RMI                       | 0.538                         | 0.538                  | 24.056   | 0.000               |
|                              | Water Evaporation         | 2.962E-05                     | 2.962E-05              | 0.108    | 0.747               |
|                              | Land Occupation           | 6.816E-08                     | 6.816E-08              | 0.034    | 0.856               |
|                              | LCO MeOH                  | 31473.052                     | 31473.052              | 0.867    | 0.369               |
| <b>Energy Source</b>         | GWI                       | 0.648                         | 0.648                  | 85.248   | 0.000               |
|                              | RMI                       | 0.910                         | 0.910                  | 40.704   | 0.000               |
|                              | Water Evaporation         | 0.022                         | 0.022                  | 79.360   | 0.000               |
|                              | Land Occupation           | 0.001                         | 0.001                  | 351.602  | 0.000               |
|                              | LCO MeOH                  | 538712.805                    | 538712.805             | 17.961   | 0.001               |

214

215

216

## 217 **S8: Data Quality Assessment**

218 Within this study, different types of data sets were utilized. To assess the resource availability for  
 219 energy, water, and CO<sub>2</sub> datasets for their distribution on a global scale were applied. To be  
 220 independent of periodical fluctuations of the regional resource availability, only data sources which  
 221 depict long-term yearly averages were used. To enable a direct comparison between different  
 222 locations, the actuality, consistency, and completeness of the datasets are very important aspects.  
 223 Therefore, for energy and water availability state-of-the-art datasets were used which cover all global  
 224 regions instead of combining data from different regions, sources, and publication dates. Even though  
 225 site specific data might be more accurate, the use of several different datasets and sources would  
 226 involve consistency errors due to the use of different methods and premises. This procedure was  
 227 selected, because a valid comparability of the different locations was seen as a very important aspect  
 228 in our analysis. However, the capacity factors for energy generation used in the models depict the  
 229 technical optimum. Capacity factors reached in practice are typically lower but show a continuously  
 230 increasing trend over the last decade<sup>30</sup>. In consequence, the results in this study possibly  
 231 underestimate the actual absolute environmental impacts and production costs in the status quo,  
 232 nevertheless the relations between the different locations would be identical if lower values for the  
 233 capacity factors would have been used. In case of CO<sub>2</sub>, the point sources were identified using publicly  
 234 available information from industry reports, scientific studies, or company reports. However, the data  
 235 availability differed between different regions and sectors. For example, while for Europe and North  
 236 America detailed information about CO<sub>2</sub>-point sources was available, no, or only few data were  
 237 available for CO<sub>2</sub> point sources in China. Furthermore, the available data for cement and waste  
 238 incineration plants was very good, while the available information about steel plants using a blast  
 239 furnace only covers around 30 % of the global production capacity. Therefore, the completeness of the  
 240 data can be enhanced for certain regions and sectors. Nevertheless, significant deviations of the results  
 241 are not expected because of the number of already included point sources.

242 For life cycle modelling, process and cost data from the literature was combined with a state-of-the-art  
243 life cycle-database (ecoinvent 3.5). The process and cost data for the CO<sub>2</sub>-based production processes  
244 were derived from recent publications. According to the data quality assessment for life cycle data  
245 introduced by Weidema et al. <sup>31</sup> their overall reliability and temporal correlation can be assessed as  
246 good. Since the material requirement for the electrolyzer and sequestration plants were also  
247 considered in this study the completeness can be assessed as good, too. However, especially for the  
248 CO<sub>2</sub>-sequestration and electrolyzer plants only demonstration plants with smaller production volumes  
249 than considered in this study exist, wherefore the technological correlation is only sufficient. Energy  
250 and material requirements of production plants with the assumed production volume can only be  
251 estimated. To handle this aspect and shed light on the uncertainty and future values for the  
252 environmental impacts and LCOEs, value ranges were considered in combination with an MCA and  
253 scenario analysis, additional to the modelling with discrete values. Furthermore, the background data  
254 was extracted from the life-cycle database which was last actualized in 2018. Thus, the actuality of the  
255 database is good, nevertheless the specific actuality and technological correlation of the included  
256 processes differ. To increase the quality of the results important background processes, such as the  
257 construction of a wind power or solar power plant as well as RSWO were cross checked with literature  
258 data and actualized if more actual data was available.

259

260

## 261 References

- 262 1 A.-M. Boulay, J. Bare, L. Benini, M. Berger, M. J. Lathuillière, A. Manzardo, M. Margni, M.  
263 Motoshita, M. Núñez, A. V. Pastor, B. Ridoutt, T. Oki, S. Worbe and S. Pfister, *Int J Life Cycle*  
264 *Assess*, 2018, **23**, 368–378.
- 265 2 DTU, *Global Wind Atlas 3.0*, available at: [www.globalwindatlas.info](http://www.globalwindatlas.info), accessed 1 December 2020.
- 266 3 Solargis, *Global Solar Atlas 3.0*, available at: [www.globalsolaratlas.info](http://www.globalsolaratlas.info), accessed 1 December  
267 2020.
- 268 4 ISWA, *Waste to Energy State of the Art Report*, International Solid Waste Association, 2012.
- 269 5 UBA, *Energy from waste incineration (Orig. Title: Energieerzeugung aus Abfällen)*, German  
270 Environment Agency, Dessau-Roßlau, 2018.
- 271 6 Cemnet, *The Global Cement Report. Online Database of Cement Plants*, Cemnet, 2019.
- 272 7 OECD, *Steelmaking Capacity*, available at:  
273 [https://stats.oecd.org/Index.aspx?datasetcode=STI\\_STEEL\\_MAKINGCAPACITY](https://stats.oecd.org/Index.aspx?datasetcode=STI_STEEL_MAKINGCAPACITY), accessed 3  
274 February 2020.
- 275 8 Worldsteel, *Top steel-producing companies*, available at: [https://www.worldsteel.org/steel-by-](https://www.worldsteel.org/steel-by-topic/statistics/top-producers.html)  
276 [topic/statistics/top-producers.html](https://www.worldsteel.org/steel-by-topic/statistics/top-producers.html), accessed 3 February 2021.
- 277 9 Agora, *Future Cost of Onshore Wind. Future cost of onshore wind. Recent auction results, long-*  
278 *term outlook and implications for upcoming German auctions.*, 2017.
- 279 10 IRENA, *Future of Wind. A Global Energy Transformation paper*, Abu Dhabi, 2019.
- 280 11 Fraunhofer ISE, *Current and Future Cost of Photovoltaics. Long-term Scenarios for Market*  
281 *Development, System Prices and LCOE of Utility-Scale PV Systems*, 2015.
- 282 12 NOW GmbH, *Industrialization of water electrolysis in Germany (Orig. Title: IndWEde*  
283 *Industrialisierung der Wasser-elektrolyse in Deutschland)*, Berlin, 2018.
- 284 13 Agora, *Die zukünftigen Kosten strombasierter synthetischer Brennstoffe*, Agora Verkehrswende,  
285 Agora Energiewende, Frontier Economics, 2018.
- 286 14 K. Bareiß, C. de La Rua, M. Möckl and T. Hamacher, *Applied Energy*, 2019, **237**, 862–872.
- 287 15 W. Zhou, Di Jiang, D. Chen, C. Griffy-Brown, Y. Jin and B. Zhu, *Energy*, 2016, **106**, 464–474.

288 16 IEA, *Energy Technology Perspectives 2020. CCUS in clean energy transitions*, International Energy  
289 Agency, 2020.

290 17 D. Baker, Holmes, Daniel, J. Hunt, P. Napier-Moore, S. Turner and M. Clark, *CO2 Capture in the*  
291 *cement industry*, IEA, 2008.

292 18 Global Petrol Prices, *Natural Gas Prices*, available at:  
293 [https://www.globalpetrolprices.com/natural\\_gas\\_prices/](https://www.globalpetrolprices.com/natural_gas_prices/), accessed 19 March 2021.

294 19 M. Fasihi, O. Efimova and C. Breyer, *Journal of Cleaner Production*, 2019, **224**, 957–980.

295 20 A. Lozanovski, *LCA of CO2 Direct Air Capture*, Aachen, 2019.

296 21 U. Caldera and C. Breyer, *Water Resour. Res.*, 2017, **53**, 10523–10538.

297 22 U. Caldera, D. Bogdanov and C. Breyer, *Desalination*, 2016, **385**, 207–216.

298 23 GWI, *Global Water Tariff Survey*, available at: [https://globalwatersecurity.org/content-hub/2019-](https://globalwatersecurity.org/content-hub/2019-02-11/What-does-the-world-pay-for-water)  
299 [02-11/What-does-the-world-pay-for-water](https://globalwatersecurity.org/content-hub/2019-02-11/What-does-the-world-pay-for-water), accessed 2 April 2021.

300 24 VCI, *Roadmap Chemie 2050. On a way to a greenhouse gas neutral chemical industry in Germany*  
301 *(orig. Title: Auf dem Weg zu einer treibhausgasneutralen chemischen Industrie in Deutschland)*,  
302 German Chemical Industry Association, Frankfurt am Main, 2019.

303 25 F. H. Saadi, N. S. Lewis and E. W. McFarland, *Energy Environ. Sci.*, 2018, **11**, 469–475.

304 26 B. Steffen, *Energy Economics*, 2020, **88**, 104783.

305 27 IRENA, *Renewable power generation costs in 2019*, Abu Dhabi, 2020.

306 28 IRENA, *Future of Solar Photovoltaic. A Global Energy Transformation paper*, 2019.

307 29 Fraunhofer ISE, *Levelized Cost of Electricity- Renewable Energy Technologies. June 2021*, Freiburg,  
308 2021.

309 30 IRENA, *Renewable power generation costs in 2019*, International Renewable Energy Agency,  
310 2020.

311 31 B. P. Weidema, C. Bauer, R. Hirsch, C. Mutel, T. Nemecek, J. Reinhard, C. O. Vadenbo and G.  
312 Wernet, *Overview and Methodology. Data quality guideline for the ecoinvent database version 3*.  
313 Ecoinvent Report 1(v3), St Gallen, 2013.

314
